# Supplementary material for: Lyotropic liquid crystal to measure residual dipolar couplings in dimethyl sulfoxide based on modified cellulose nanocrystals
Source: Royal Society of Chemistry journal article supplement (doi:10.1039/c9nj06031f), 2020-01-01
Supplement: c9nj06031f1.pdf [file c9nj06031f1.pdf]

## Supporting information

### Lyotropic liquid crystal to measure residual dipolar couplings in dimethyl sulfoxide based on modified cellulose nanocrystals

Zong-Kai Ma,<sup>a</sup> Xiao-Yang Han,<sup>b</sup> Han Liu,<sup>b</sup> Jia-Cheng Ji,<sup>b</sup> Si-Yong Qin,<sup>\*a</sup> Xiang-Dan Li<sup>\*a</sup> and  
Xinxiang Lei<sup>\*b</sup>

<sup>a</sup>College of Chemistry and Materials Science, South-Central University for Nationalities, Wuhan 430074, P. R. China.

<sup>b</sup>School of Pharmaceutical Sciences, South-Central University for Nationalities, Wuhan, 430074 (P. R. China).

E-mail: sy-qin@mail.scuec.edu.cn; lixiangdan@mail.scuec.edu.cn; xxlei@mail.scuec.edu.cn.

## Experimental Section

**Materials:**  $\alpha$ -cellulose was bought from Aladdin. Acrylic acid (AA) with a purity of 97% was provided by Aladdin. Sulfuric acid ( $\text{H}_2\text{SO}_4$ ) was obtained from Sinopharm Chemical Reagent Co., Ltd. Potassium persulfate (KPS) was obtained from Sinopharm Chemical Reagent Co., Ltd.

**Preparation of cellulose crystallite Suspension:** The cellulose crystallite suspension was prepared from  $\alpha$ -cellulose power according to the previous literature.<sup>1</sup> In detail, the  $\alpha$ -cellulose power (20 g) was mixed with sulfuric acid (175 mL, 64%) and stirred at 45 °C for 1 h. Then, a plenty of iced distilled water was added and the residual acid was removed through centrifugation. The sample was repeatedly centrifuged at 8000rpm for 10 min, and turbid supernatant was collected. 100 mL of the cellulose suspension (concentration:  $0.7 \text{ mg mL}^{-1}$ ) was mixed with 311 mg of acrylic acid and 108 mg of  $\text{K}_2\text{S}_2\text{O}_8$ . The mixture was then kept at 80 °C in a nitrogen atmosphere for 6 h (Fig 1a). After the incubation, the solution was transferred into centrifuge tubes and centrifuged at a speed of 15000 rpm for 2 h. The precipitate was collected. Finally, [D6]-DMSO was used to remove residual water for at least 6 times by centrifugation.

**SEM characterization:** Scanning electron microscopy (SEM) images of cellulose crystallite suspension at a low concentration of 0.1 wt% were obtained on a Nova NanoSEM FEI (Holland) instrument with an accelerating voltage of 30 Kv.

**FT-IR spectroscopy:** The FT-IR Spectra of CNC and CNC-g-AA were obtained by IRTracer-100 (Shimadzu, Kyoto, Japan). The samples were dried and pressed into pellets with KBr powder before the measurement.

**Polarized Optical Microscopy (POM):** POM graphs were performed on a XPV-203E polarized microscope that was purchased from Shanghai Changfang Optical Instrument Co. The CNC-g-AA fluid samples were loaded into the planar cells.

**NMR analysis:** All  $^1\text{H}$  NMR and  $^2\text{H}$  NMR data were obtained on a Bruker Avance III NMR spectrometer (600.11 MHz for  $^1\text{H}$  NMR; 92.12 MHz for  $^2\text{H}$  NMR; 150.91 MHz for  $^{13}\text{C}$  NMR, respectively) equipped with a 5-mm BBO Prodigy cryo-probe, BB-(H-F)-D-05-Z (Bruker Instruments Inc., Germany) at 295 K. The  $^2\text{H}$  NMR acquisition was recorded using the lock channel. The *J*-Resolved HSQC experiment used homonuclear decoupling (pure-shift). All couplings could be extracted from the *J*-resolved spectra. All data were analyzed and processed using Bruker Top-spin 3.5pl 6 software.

**Structure optimization:** The initial structures were obtained from the Cambridge Crystallographic Data Centre (CCDC), and the optimization and frequency calculations were performed by Gaussian 09 software package<sup>2</sup> using B3PW91/6-311 g (d) level of theory under the IEFPCM solvation model with DMSO parameters.

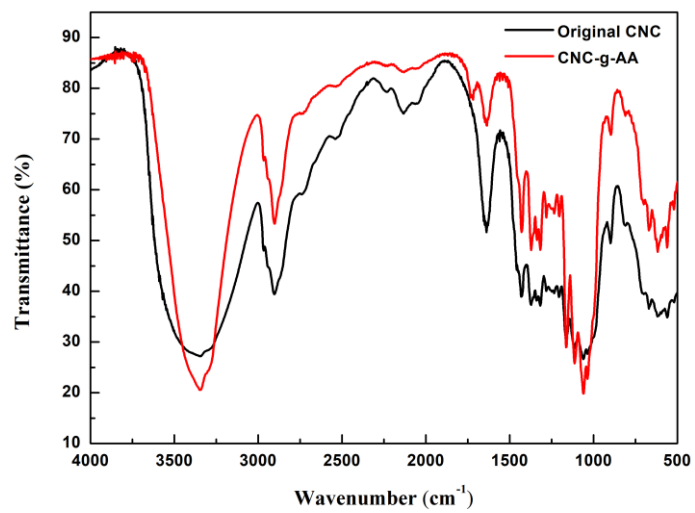

Fig. S1 FT-IR spectra of CNC (black) and CNC-g-AA (red)

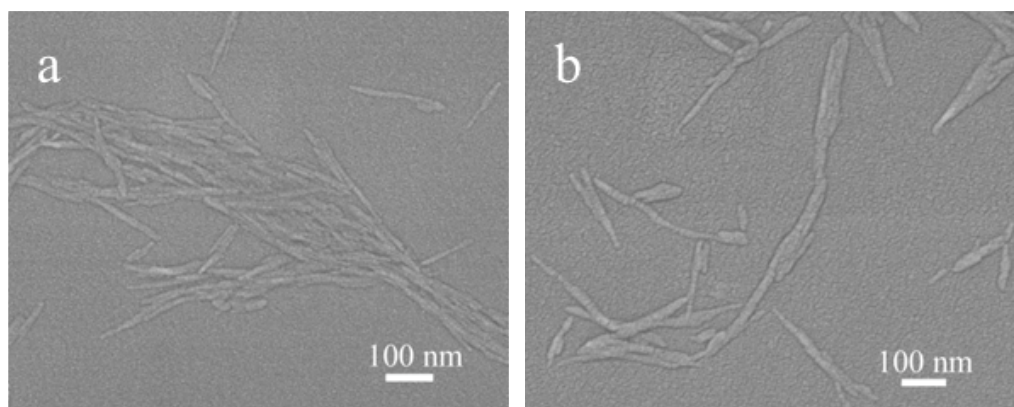

Fig. S2 SEM images of unmodified CNC (a) and CNC-g-AA (b).

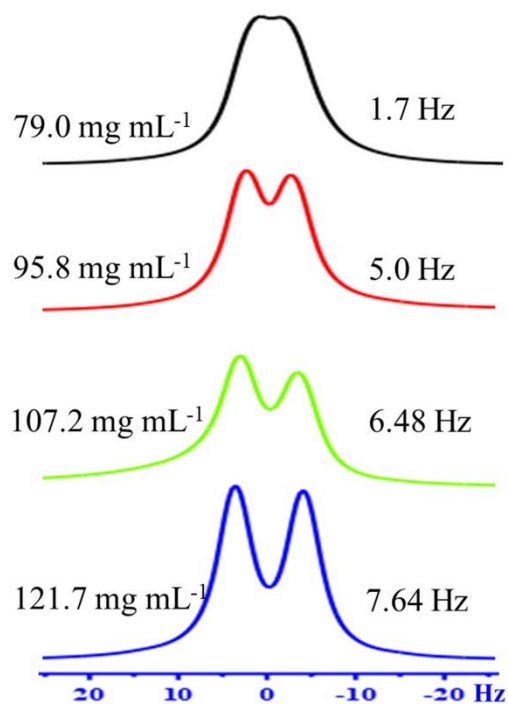

Fig. S3 1D  $^2\text{H}$  spectra of CNC-g-AA LCs in dependence on concentration (79.0, 95.8, 107.2 and 121.7 mg mL $^{-1}$ ) in [D6]-DMSO collected at 22 °C.

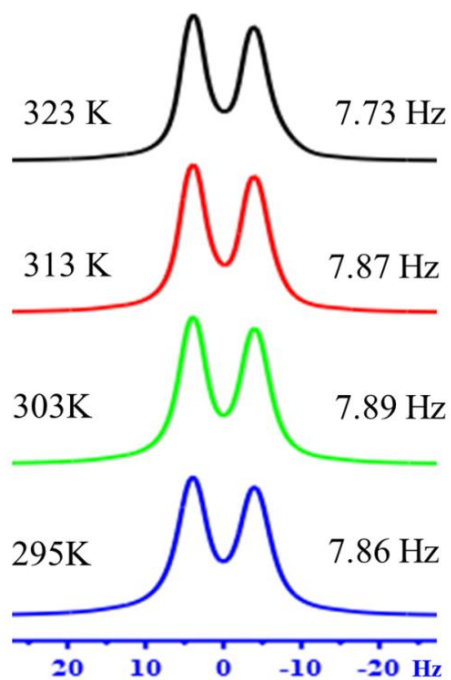

Fig. S4 1D  $^2\text{H}$  spectra of the CNC-g-AA LCs (116 mg mL $^{-1}$ ) sample were recorded at various temperatures.

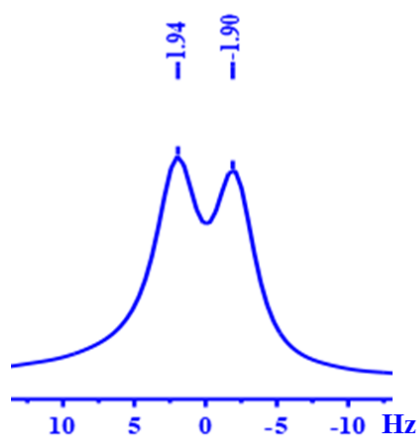

Fig. S5 1D  $^2\text{H}$  NMR spectrum of the anisotropic sample containing 2.0 mg artemisinin in  $85 \text{ mg mL}^{-1}$  CNC-g-AA LCs phase resolved in DMSO showing quadrupolar couplings of 3.84 Hz with the linewidth of 1.81 Hz.

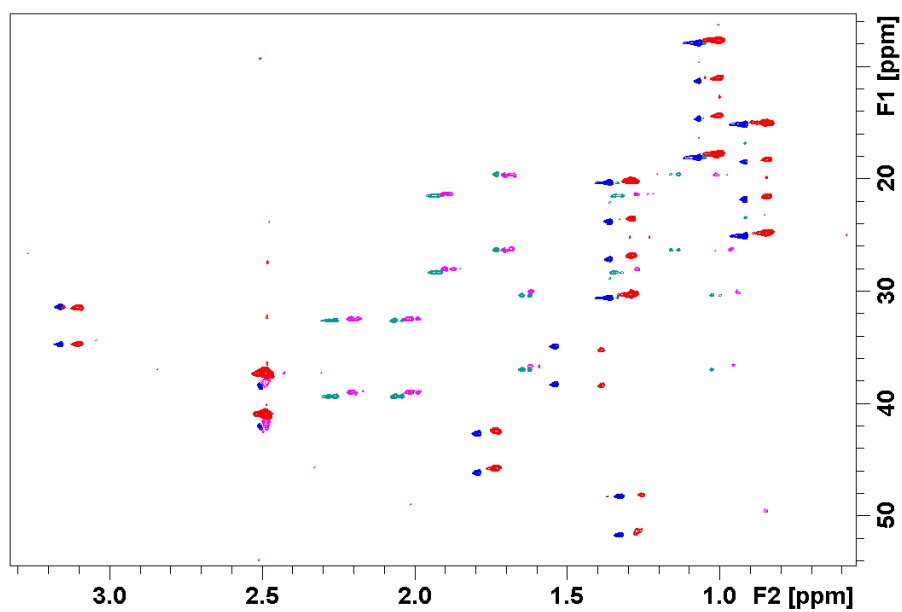

Fig. S6 Overlaid JSB-HSQC spectra of artemisinin in the isotropic phase (blue contours) and in anisotropic CNC-g-AA LCs (red contours).

Table S1 Comparison residual dipolar couplings of artemisinin extracted from JSB-HSQC spectra in the anisotropic. The assignment of artemisinin was taken from reference 3.

| Atom number                 | Exp. RDC (Hz) | Comp. RDC (Hz) |
|-----------------------------|---------------|----------------|
| C1, H1                      | -4.2          | -3.97          |
| C2, H2 <sub>a, b</sub>      | -1.8          | -1.90          |
| C3, H3 <sub>a, b</sub>      | -2.2          | -2.45          |
| C5, H5                      | -2.4          | -2.35          |
| C7, H7                      | -3.2          | -3.40          |
| C8, H8 <sub>a, b</sub>      | -1.4          | -1.28          |
| C9, H9 <sub>a, b</sub>      | -1.4          | -1.93          |
| C10, H10                    | -4.1          | -4.00          |
| C11, H11                    | -2.9          | -2.85          |
| C13, H13 <sub>a, b, c</sub> | -0.4          | -0.34          |
| C14, H14 <sub>a, b, c</sub> | -1.0          | -0.97          |
| C15, H15 <sub>a, b, c</sub> | -1.3          | -1.47          |

### Calculated corresponding alignment tensor for artemisinin.

Alignment tensor information:

A'x=-1.014e-05

A'y=-7.596e-05

A'z= 8.609e-05

Saupe tensor

S'x=-1.520e-05

S'y=-1.139e-04

S'z= 1.291e-04

Alignment tensor eigenvectors

e[x]=( 0.984, 0.014,-0.176)

e[y]=( 0.004, 0.995, 0.099)

e[z]=( 0.176,-0.099, 0.979)

Alignment tensor in laboratory coordinates:

[-7.147e-06,-1.927e-06,1.659e-05]

[-1.927e-06,-7.437e-05,-1.581e-05]

[ 1.659e-05,-1.581e-05,8.152e-05]

SVD condition number is 6.240e+00

Axial component Aa = 1.291e-04

Rhombic component Ar = 6.582e-05

Field=600.00 Teslas[ 0.07]

rhombicity R = 0.510

Asimmetry parameter etha =7.645e-01

GDO = 1.695e-04

ZY'Z'' Euler Angles (degrees)

Set 1

(-29.2,11.7,29.5)

Set 2

(150.8,-11.7,-150.5)

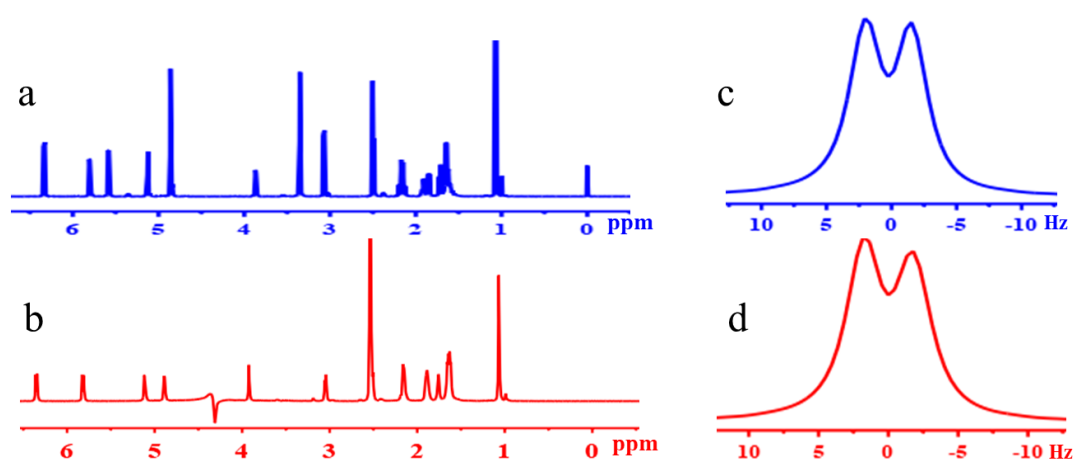

Fig. S7 (a) and (b) 1D  $^1\text{H}$  NMR spectra of gibberellin in isotropic  $[\text{D}_6]$ -DMSO (blue), and in anisotropic CNC-g-AA LCs using a NOESYPR1D pulse sequence for water suppression (red). (c) and (d) 1D  $^2\text{H}$  spectra of CNC-g-AA LCs ( $81.3 \text{ mg mL}^{-1}$ ;  $3.46 \text{ Hz}$ ) spectral changes before (blue) and after testing (red) in  $[\text{D}_6]$ -DMSO collected.

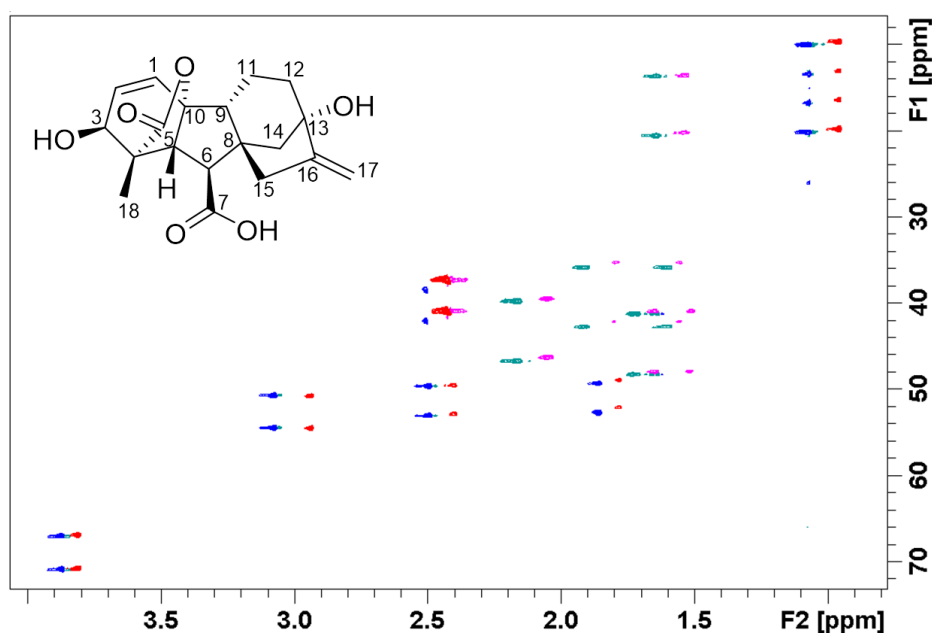

Fig. S8 Overlaid JSB-HSQC spectra of gibberellin in the isotropic phase (blue contours) and in anisotropic CNC-g-AA LCs (red contours).



Table S2  $^1J_{\text{CH}}$  spin coupling constants, total spin coupling constants  $^1T_{\text{CH}}$  and RDC values for gibberellin. The assignment of a gibberellin was taken from reference 4.

| Atom number                 | $^1J$ (Hz) | $^1T$ (Hz) | Exp. RDC (Hz) | Comp. RDC (Hz) |
|-----------------------------|------------|------------|---------------|----------------|
| C1, H1                      | 167.0      | 166.7      | -0.2          | -0.27          |
| C2, H2                      | 163.8      | 158.8      | -2.5          | -2.60          |
| C3, H3                      | 145.5      | 147.5      | 1.0           | 0.88           |
| C5, H5                      | 142.0      | 139.6      | -1.2          | -1.37          |
| C6, H6                      | 129.4      | 122.5      | -3.5          | -3.08          |
| C9, H9                      | 126.6      | 119.9      | -3.4          | -3.62          |
| C11, H11 <sub>a, b</sub>    | 129.1      | 125.2      | -2.0          | -2.10          |
| C12, H12 <sub>a, b</sub>    | 130.2      | 128.6      | -0.8          | -1.01          |
| C14, H14 <sub>a, b</sub>    | 132.4      | 132.1      | -0.2          | -0.25          |
| C15, H15 <sub>a, b</sub>    | 131.4      | 128.4      | -1.5          | -1.51          |
| C17, H17 <sub>a, b</sub>    | 157.0      | 160.3      | 1.7           | 1.52           |
| C18, H18 <sub>a, b, c</sub> | 127.9      | 127.6      | -0.2          | -0.15          |

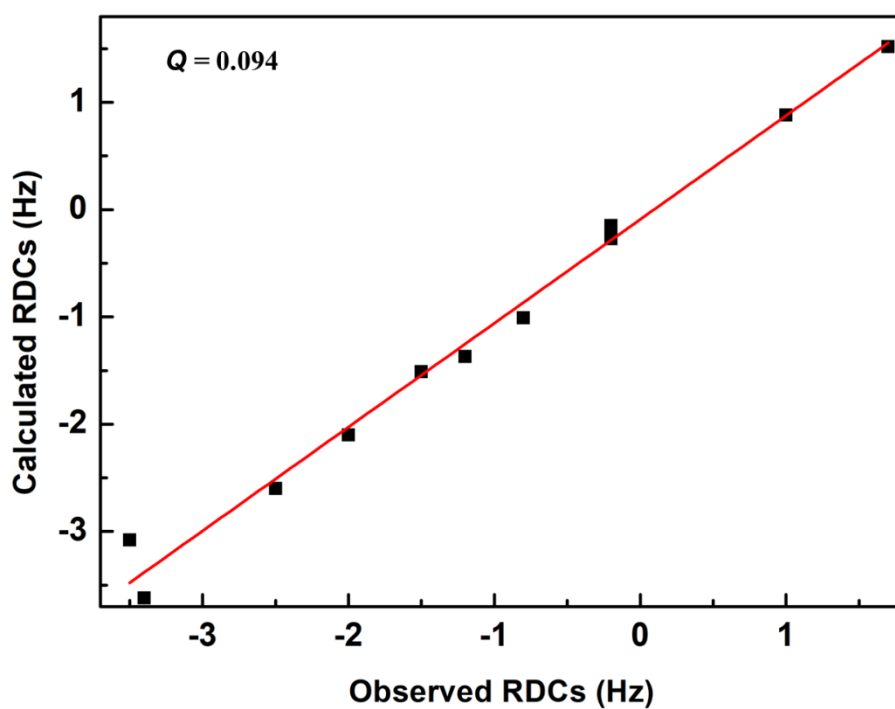

Fig. S9 Correlation between experimental  $^1D_{\text{CH}}$  and the back-calculated ones for gibberellin aligned in CNC-g-AA LCs.

### Calculated Corresponding alignment tensor for Gibberellin.

Alignment tensor information:

A'x=-2.031e-05

A'y=-4.901e-05

A'z= 6.932e-05

Saupe tensor

S'x=-3.046e-05

S'y=-7.352e-05

S'z= 1.040e-04

Alignment tensor eigenvectors

e[x]=(-0.092, 0.994,-0.060)

e[y]=( 0.295, 0.085, 0.952)

e[z]=( 0.951, 0.070,-0.301)

Alignment tensor in laboratory coordinates:

[ 5.827e-05,5.256e-06,-3.371e-05]

[ 5.256e-06,-2.007e-05,-4.204e-06]

[-3.371e-05,-4.204e-06,-3.819e-05]

SVD condition number is 4.425e+00

Axial component Aa = 1.040e-04

Rhombic component Ar = 2.870e-05

Field=600.00 Teslas[ 0.07]

rhombicity R = 0.276

Asimmetry parameter etha =4.141e-01

GDO = 1.251e-04

ZY'Z'' Euler Angles (degrees)

Set 1

(4.2,107.5,86.4)

Set 2

(-175.8,-107.5,-93.6)

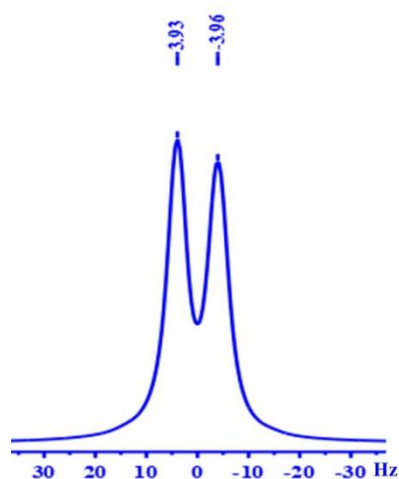

Fig. S10 1D  $^2\text{H}$  NMR spectrum of the anisotropic sample containing 5.0 mg oridonin in 116  $\text{mg mL}^{-1}$  CNC-g-AA LCs phase resolved in DMSO showing quadrupolar couplings of 7.89 Hz with the line width of 3.27 Hz.

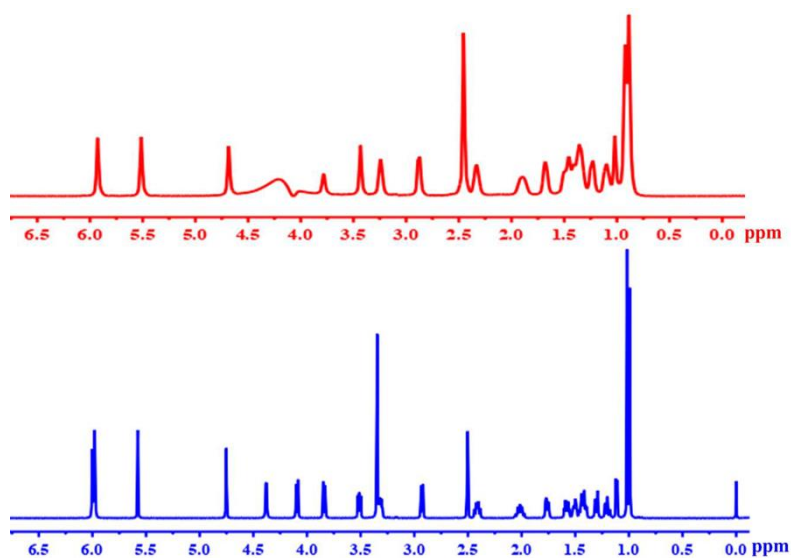

Fig. S11 (a) and (b) 1D  $^1\text{H}$  NMR spectra of oridonin in isotropic  $[\text{D}_6]\text{-DMSO}$  (blue) and in anisotropic CNC-g-AA LCs using a NOESYPR1D pulse sequence for water suppression (red).

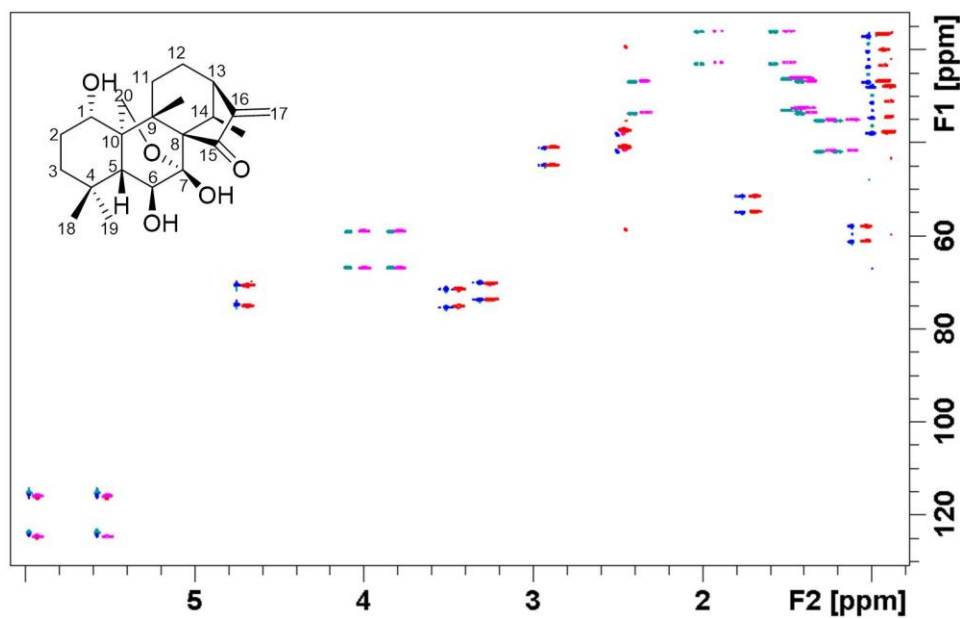

Fig. S12 Overlaid JSB-HSQC spectra of oridonin in the isotropic phase (blue contours) and in anisotropic CNC-g-AA LCs (red contours).

Table S3  $^1J_{CH}$  spin coupling constants, total spin coupling constants  $^1T_{CH}$  and RDC values for oridonin. The assignment of a oridonin was taken from reference 5.

| Atom number               | $^1J$ (Hz) | $^1T$ (Hz) | Exp. RDC (Hz) | Comp.RDC (Hz) |
|---------------------------|------------|------------|---------------|---------------|
| C1, H1                    | 139.2      | 129.6      | -4.8          | -4.86         |
| C2, H2 <sub>a,b</sub>     | 126.6      | 121.8      | -2.4          | -2.62         |
| C3, H3 <sub>a,b</sub>     | 126.1      | 123.7      | -1.2          | -0.83         |
| C5, H5                    | 124.4      | 118.9      | -2.8          | -2.54         |
| C6, H6                    | 145.6      | 137.4      | -4.1          | -4.31         |
| C9, H9                    | 130.6      | 126.6      | -2.0          | -2.13         |
| C11, H11 <sub>a,b</sub>   | 130.0      | 127.2      | -1.4          | -1.39         |
| C12, H12 <sub>a,b</sub>   | 129.4      | 127.5      | -1.0          | -0.88         |
| C13, H13                  | 141.1      | 146.3      | 2.5           | 2.35          |
| C14, H14                  | 156.9      | 163.9      | 3.5           | 3.33          |
| C17, H17 <sub>a,b</sub>   | 160.7      | 163.8      | 1.6           | 1.62          |
| C18, H18 <sub>a,b,c</sub> | 124.3      | 126.8      | 1.3           | 1.26          |
| C19, H19 <sub>a,b,c</sub> | 125.4      | 123.5      | -1.0          | -1.11         |
| C20, H20 <sub>a,b</sub>   | 146.5      | 149.5      | 1.5           | 1.51          |

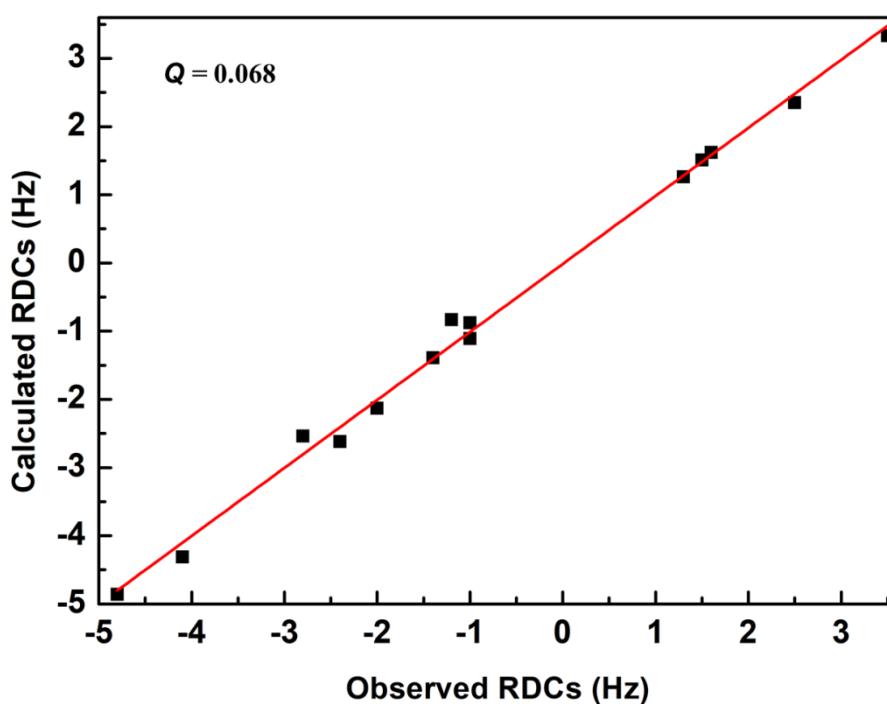

Fig. S13 Correlation between the experimental and calculated  $^1D_{CH}$  values of oridonin.

### Calculated Corresponding alignment tensor for oridonin.

Alignment tensor information:

A'x=-3.357e-05

A'y=-6.330e-05

A'z= 9.686e-05

Saupe tensor

S'x=-5.035e-0

S'y=-9.494e-05

S'z= 1.453e-04

Alignment tensor eigenvectors

e[x]=( 0.912,-0.251,-0.325)

e[y]=( 0.383, 0.806, 0.452)

e[z]=( 0.149,-0.536, 0.831)

Alignment tensor in laboratory coordinates:

[-3.505e-05,-1.957e-05,1.096e-05]

[-1.957e-05,-1.533e-05,-6.895e-05]

[ 1.096e-05,-6.895e-05,5.038e-05]

SVD condition number is 3.380e+00

Axial component Aa = 1.453e-04

Rhombic component Ar = 2.973e-05

Field=600.00 Teslas[ 0.07]

rhombicity R = 0.205

Asimmetry parameter etha =3.069e-01

GDO = 1.717e-04

ZY'Z'' Euler Angles (degrees)

Set 1

(-74.5,33.8,54.3)

Set 2

(105.5,-33.8,-125.7)

## REFERENCES

1. X. M. Dong, T. Kimura, J. F. Revol and D. G. Gray, *Langmuir*, 1996, **12**, 2076-2082.
2. M. J. Frisch, G. W. Trucks, H. B. Schlegel, G. E. Scuseria, M. A. Robb, J. R. Cheeseman, G. Scalmani, V. Barone, G. A. Petersson, H. Nakatsuji, X. Li, M. Caricato, A. Marenich, J. Bloino, B. G. Janesko, R. Gomperts, B. Mennucci, H. P. Hratchian, J. V. Ortiz, A. F. Izmaylov, J. L. Sonnenberg, D. Williams - Young, F. Ding, F. Lipparini, F. Egidi, J. Goings, B. Peng, A. Petrone, T. Henderson, D. Ranasinghe, V. G. Zakrzewski, J. Gao, N. Rega, G. Zheng, W. Liang, M. Hada, M. Ehara, K. Toyota, R. Fukuda, J. Hasegawa, M. Ishida, T. Nakajima, Y. Honda, O. Kitao, H. Nakai, T. Vreven, K. Throssell, J. A. Montgomery Jr., J. E. Peralta, F. Ogliaro, M. Bearpark, J. J. Heyd, E. Brothers, K. N. Kudin, V. N. Staroverov, T. Keith, R. Kobayashi, J. Normand, K. Raghavachari, A. Rendell, J. C. Burant, S. S. Iyengar, J. Tomasi, M. Cossi, J. M. Millam, M. Klene, C. Adamo, R. Cammi, J. W. Ochterski, R. L. Martin, K. Morokuma, O. Farkas, J. B. Foresman, D. J. Fox, Gaussian 09, Revision E.01, Gaussian, Inc., Wallingford CT **2016**.
3. A. Navarro-Vázquez, R. R. Gil and K. Blinov, *J. Nat. Prod.*, 2018, **81**, 203-210.
4. L. N. Mander, *Chem. Rev.*, 1992, **92**, 573-612
5. M. Kong, M.T. Wang, *Chin. J. Magn. Reson.* 1993, **10**, 309-314.

## The coordinate data file for the analytes

### 1. artemisinin

Symbolic Z-matrix:

Charge = 0 Multiplicity = 1

|   |        |         |         |
|---|--------|---------|---------|
| O | 3.9123 | 14.984  | -0.0191 |
| O | 2.0129 | 14.0686 | 0.2864  |
| O | 4.1391 | 17.6483 | -1.3173 |
| O | 4.1202 | 16.81   | -2.5201 |
| O | 5.7456 | 16.427  | -0.2482 |
| C | 2.7783 | 14.4781 | -0.4964 |
| C | 2.561  | 14.5022 | -2.0492 |
| C | 3.9501 | 14.4299 | -2.762  |
| C | 4.8006 | 15.5381 | -2.3356 |
| C | 5.1408 | 15.2972 | -0.7573 |
| C | 5.4715 | 17.7062 | -0.84   |
| C | 6.5488 | 17.9711 | -1.9474 |
| C | 7.1442 | 16.6462 | -2.5138 |
| C | 6.1425 | 15.6826 | -3.112  |
| C | 6.804  | 14.2372 | -3.2838 |
| C | 5.8685 | 13.0809 | -3.6784 |
| C | 4.6116 | 13.105  | -2.8511 |
| C | 1.5687 | 13.4181 | -2.3865 |
| C | 5.4999 | 18.7661 | 0.1464  |
| C | 7.9191 | 14.3335 | -4.2957 |
| H | 2.2444 | 15.2755 | -2.4336 |
| H | 3.9369 | 14.3576 | -3.7363 |
| H | 5.8807 | 14.6034 | -0.7159 |
| H | 7.3001 | 18.5348 | -1.5897 |
| H | 6.152  | 18.4409 | -2.629  |
| H | 7.6696 | 16.1355 | -1.7883 |
| H | 7.8907 | 16.8172 | -3.1648 |
| H | 5.9998 | 15.8657 | -4.0577 |
| H | 7.2094 | 13.8927 | -2.4578 |
| H | 6.2247 | 12.2498 | -3.8178 |
| H | 5.5008 | 13.3435 | -4.6457 |
| H | 4.8384 | 12.6497 | -2.0352 |
| H | 3.9586 | 12.3678 | -3.2813 |
| H | 1.8059 | 12.5292 | -2.0148 |
| H | 0.705  | 13.6084 | -1.8545 |
| H | 1.2861 | 13.2977 | -3.2584 |
| H | 5.2561 | 19.6695 | -0.2762 |
| H | 4.88   | 18.7107 | 0.8846  |
| H | 6.3712 | 19.0046 | 0.574   |



|   |        |         |         |
|---|--------|---------|---------|
| H | 8.6004 | 14.9478 | -4.066  |
| H | 8.3992 | 13.4687 | -4.4898 |
| H | 7.5865 | 14.5913 | -5.1854 |

## 2. Gibberelin

Symbolic Z-matrix:

Charge = 0 Multiplicity = 1

|   |   |         |         |         |
|---|---|---------|---------|---------|
| C | 0 | 13.7555 | 11.2449 | 1.6813  |
| C | 0 | 14.0844 | 12.2729 | 2.465   |
| C | 0 | 13.4357 | 12.5111 | 3.8117  |
| C | 0 | 12.2534 | 11.5438 | 4.0841  |
| C | 0 | 12.6983 | 10.1465 | 3.6605  |
| C | 0 | 11.7192 | 8.9968  | 3.8875  |
| C | 0 | 11.923  | 8.2913  | 5.1977  |
| C | 0 | 11.9163 | 8.0444  | 2.6708  |
| C | 0 | 12.5869 | 8.927   | 1.5562  |
| C | 0 | 12.665  | 10.3213 | 2.1446  |
| C | 0 | 11.8875 | 8.8197  | 0.204   |
| C | 0 | 11.611  | 7.3629  | -0.1798 |
| C | 0 | 11.2254 | 6.4933  | 1.0384  |
| C | 0 | 10.6367 | 7.3935  | 2.1381  |
| C | 0 | 12.7933 | 6.8019  | 2.9179  |
| C | 0 | 12.4705 | 5.9299  | 1.7306  |
| C | 0 | 13.1004 | 4.8248  | 1.341   |
| C | 0 | 11.715  | 11.7028 | 5.4932  |
| C | 0 | 11.1738 | 11.8211 | 3.024   |
| O | 0 | 14.3762 | 12.3054 | 4.8599  |
| O | 0 | 12.9385 | 8.2844  | 5.8497  |
| O | 0 | 10.8218 | 7.5955  | 5.5568  |
| O | 0 | 11.3864 | 11.0205 | 1.9469  |
| O | 0 | 10.362  | 5.4874  | 0.5486  |
| O | 0 | 10.258  | 12.5911 | 3.0933  |
| H | 0 | 14.2216 | 11.084  | 0.7096  |
| H | 0 | 14.856  | 12.9828 | 2.16    |
| H | 0 | 13.0415 | 13.5421 | 3.8519  |
| H | 0 | 13.6941 | 9.8886  | 4.0366  |
| H | 0 | 10.6829 | 9.3564  | 3.8586  |
| H | 0 | 13.6281 | 8.5909  | 1.442   |
| H | 0 | 12.489  | 9.3123  | -0.5711 |
| H | 0 | 10.9487 | 9.3818  | 0.2554  |
| H | 0 | 12.4753 | 6.9056  | -0.6764 |
| H | 0 | 10.7706 | 7.3159  | -0.8835 |

|   |   |         |         |        |
|---|---|---------|---------|--------|
| H | 0 | 9.8926  | 8.1054  | 1.7662 |
| H | 0 | 10.1645 | 6.7914  | 2.9279 |
| H | 0 | 12.4742 | 6.2845  | 3.8352 |
| H | 0 | 13.8595 | 7.0295  | 3.0341 |
| H | 0 | 12.7446 | 4.264   | 0.476  |
| H | 0 | 13.9778 | 4.4466  | 1.8659 |
| H | 0 | 12.4968 | 11.4667 | 6.22   |
| H | 0 | 11.3708 | 12.7315 | 5.6507 |
| H | 0 | 10.8566 | 11.0412 | 5.6598 |
| H | 0 | 15.1141 | 12.9174 | 4.7366 |
| H | 0 | 11.0411 | 7.1338  | 6.3865 |
| H | 0 | 10.2539 | 4.8309  | 1.252  |

### 3. oridonin

Symbolic Z-matrix:

Charge = 0 Multiplicity = 1

|   |          |          |          |
|---|----------|----------|----------|
| O | 0.08841  | -0.21245 | 2.17687  |
| O | 0.54941  | -2.81482 | -0.31368 |
| O | -1.13865 | -2.07335 | 1.77513  |
| O | -1.63118 | -1.82495 | -1.60426 |
| O | -3.40553 | -0.74092 | 1.50733  |
| O | 1.55919  | 3.25613  | 0.34942  |
| C | 1.81966  | 2.04897  | -0.36424 |
| C | 3.31819  | 1.80111  | -0.44147 |
| C | 3.63424  | 0.53332  | -1.21534 |
| C | 3.06028  | -0.7239  | -0.54438 |
| C | 1.52062  | -0.52568 | -0.37953 |
| C | 0.83111  | -1.65023 | 0.42459  |
| C | -0.39912 | -1.07131 | 1.14794  |
| C | -1.33837 | -0.23537 | 0.26702  |
| C | -0.48111 | 0.97031  | -0.32454 |
| C | 0.99505  | 0.8463   | 0.17113  |
| C | -1.17152 | 2.31696  | -0.07205 |
| C | -2.64657 | 2.30711  | -0.49622 |
| C | -3.34848 | 0.97902  | -0.12827 |
| C | -2.58695 | 0.30374  | 1.015    |
| C | -2.01499 | -0.87719 | -0.93997 |
| C | -3.22947 | -0.06114 | -1.21782 |
| C | -4.01849 | -0.28728 | -2.26734 |
| C | 3.82424  | -0.99994 | 0.76094  |
| C | 3.31312  | -1.91548 | -1.47994 |
| C | 0.96901  | 0.81666  | 1.70072  |
| H | -2.82806 | -1.36406 | 1.97269  |
| H | 3.74134  | 1.74952  | 0.5702   |

|   |          |          |          |
|---|----------|----------|----------|
| H | 3.77503  | 2.67363  | -0.91981 |
| H | 4.71766  | 0.41934  | -1.33432 |
| H | 3.22156  | 0.61934  | -2.22963 |
| H | -0.64263 | 3.10314  | -0.61204 |
| H | -1.09515 | 2.58912  | 0.98336  |
| H | -2.73721 | 2.47945  | -1.5731  |
| H | -3.16095 | 3.1383   | -0.00446 |
| H | -4.39146 | 1.15178  | 0.14597  |
| H | -2.31423 | 0.99203  | 1.81937  |
| H | -3.78486 | -1.08423 | -2.96739 |
| H | -4.91062 | 0.30148  | -2.45805 |
| H | 3.70983  | -0.22167 | 1.5175   |
| H | 4.894    | -1.07675 | 0.5415   |
| H | 3.52938  | -1.94876 | 1.21604  |
| H | 2.92918  | -2.84713 | -1.06134 |
| H | 4.38804  | -2.03338 | -1.65496 |
| H | 2.83153  | -1.7655  | -2.45186 |
| H | 1.9629   | 0.64349  | 2.12287  |
| H | 0.60035  | 1.76494  | 2.09676  |
| H | 1.48716  | -1.97646 | 1.23841  |
| H | 1.12194  | -0.60272 | -1.40052 |
| H | 1.46627  | 2.24381  | -1.38426 |
| H | -0.53909 | -2.66359 | 2.24704  |
| H | -0.17692 | -2.60377 | -0.92948 |
| H | -0.4324  | 0.84501  | -1.41423 |
| H | 2.16151  | 3.30054  | 1.09983  |
